# Supplementary material for: Heat-triggered drug release systems based on mesoporous silica nanoparticles filled with a maghemite core and phase-change molecules as gatekeepers
Source: Royal Society of Chemistry journal article supplement (doi:10.1039/c3tb21229g), 2013-11-04
Supplement: c3tb21229g.pdf [file c3tb21229g.pdf]

## Supporting information

### Heat-triggered Drug Release Systems based on Mesoporous Silica Nanoparticles and Phase-change Molecules as Gatekeepers

Ji Liu, Christophe Detrembleur, Marie-Claire De Pauw-Gillet, Stéphane Mornet, Luce Vander Elst, Sophie Laurent, Christine Jérôme\* and Etienne Duguet\*

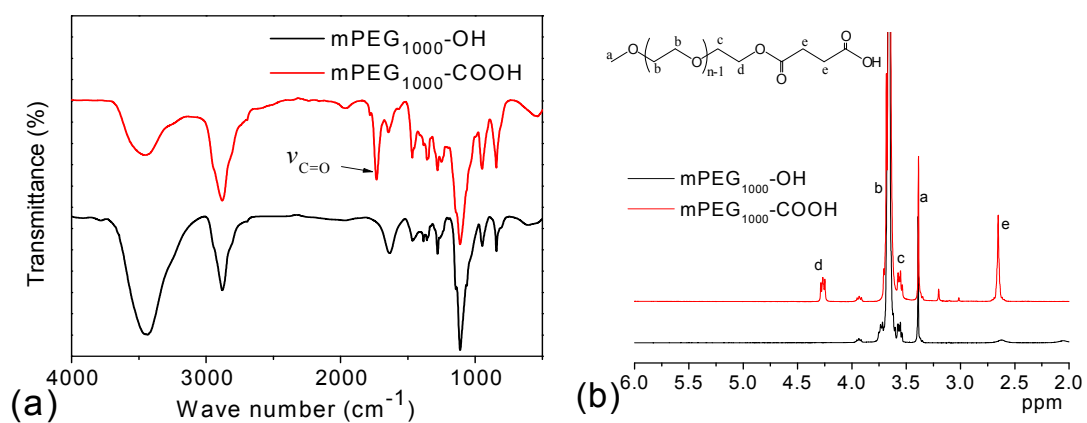

Figure S1. FT-IR spectrum (a) and <sup>1</sup>H NMR spectrum (b) of mPEG<sub>1000</sub>-OH and mPEG<sub>1000</sub>-COOH

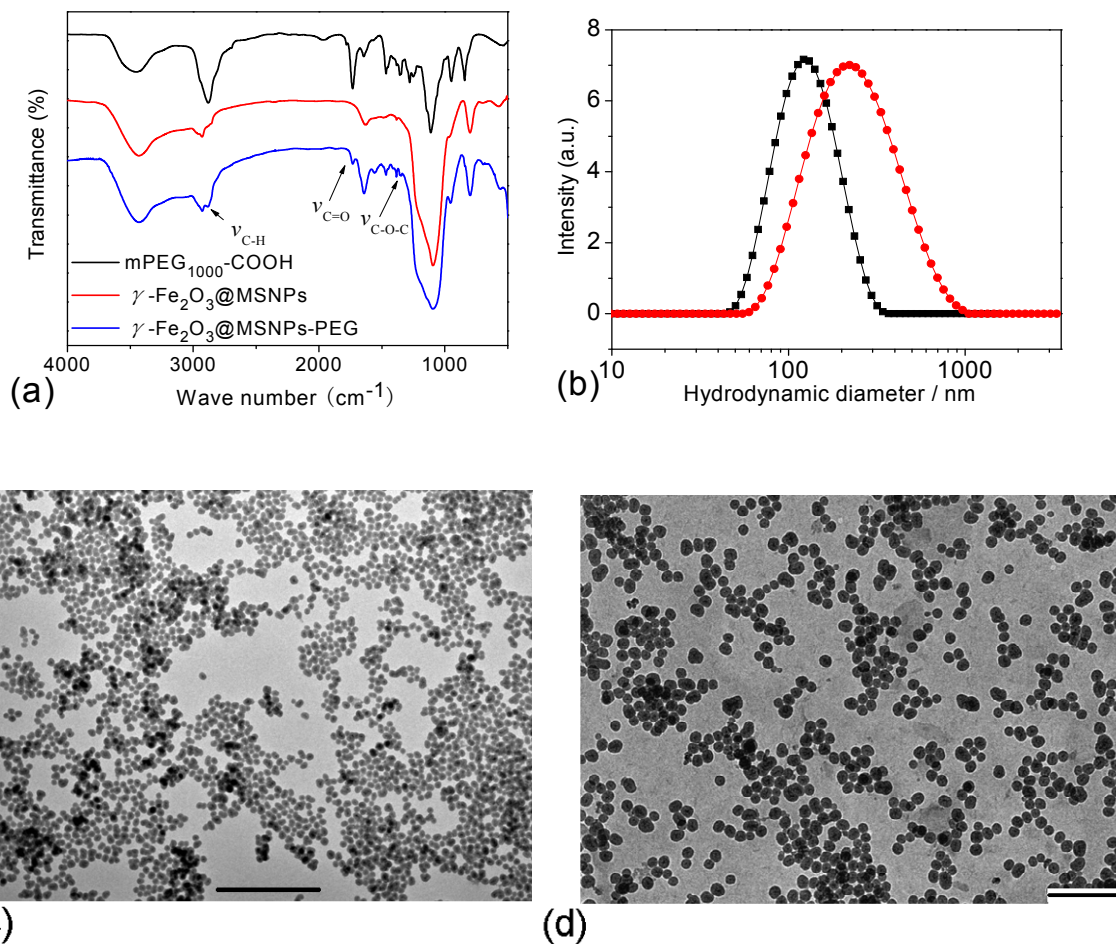

**Figure S2.** FTIR spectrum of the  $\gamma$ -Fe<sub>2</sub>O<sub>3</sub>@MSNPs before and after PEGylation (a); size distribution diagrams of the  $\gamma$ -Fe<sub>2</sub>O<sub>3</sub>@MSNPs before (black) and after (red) PEGylation from DLS analyses (b); and TEM image of the  $\gamma$ -Fe<sub>2</sub>O<sub>3</sub>@MSNPs with lower magnification (c, scale bar: 1000 nm) and (d, scale bar: 500 nm).

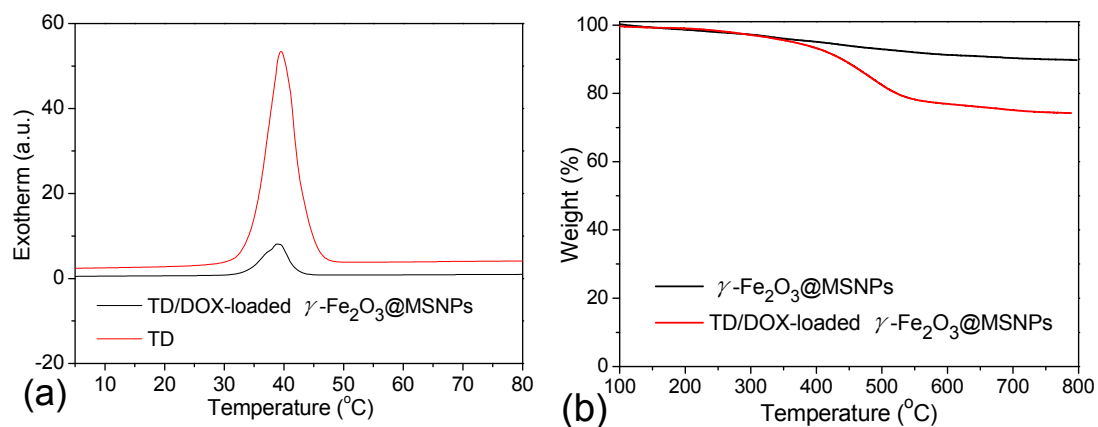

**Figure S3.** DSC (a) and TGA (b) curves of the TD/DOX-loaded  $\gamma\text{-Fe}_2\text{O}_3\text{@MSNPs}$

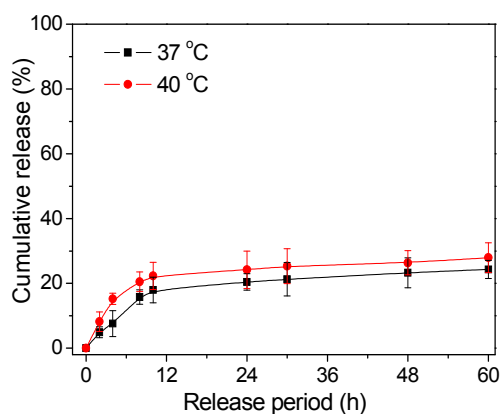

**Figure S4.** Release profiles of DOX from the DOX-loaded  $\gamma\text{-Fe}_2\text{O}_3\text{@MSNPs}$  (without TD as gatekeepers, *DLC* and *DLE* of *ca.* 11.6 wt. % and 25.1 %) at different temperatures. The cumulative release was presented as mean value  $\pm$  standard deviation ( $n = 3$ ), and the solid lines just serve to guide the eyes.

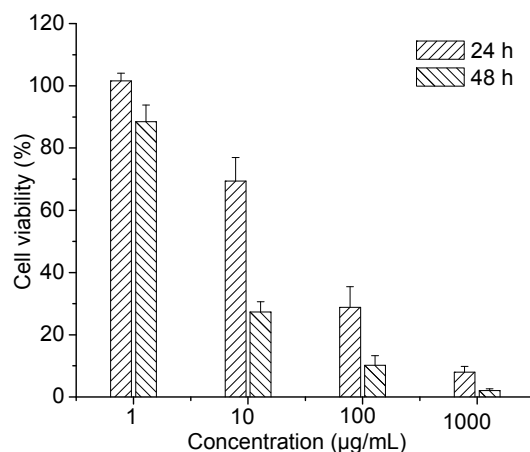

**Figure S5.** Cytotoxicity profiles of the  $\gamma\text{-Fe}_2\text{O}_3\text{@MSNPs}$  before CTAB extraction against the melanoma MEL-5 cell lines via the MTS assay, with different incubation concentrations for different periods at 37 °C. Untreated cells were taken as a control (100% viability), and percentage cell viabilities were all expressed relative to the control. Results were all presented as mean value  $\pm$  standard deviation ( $n = 5$ ).

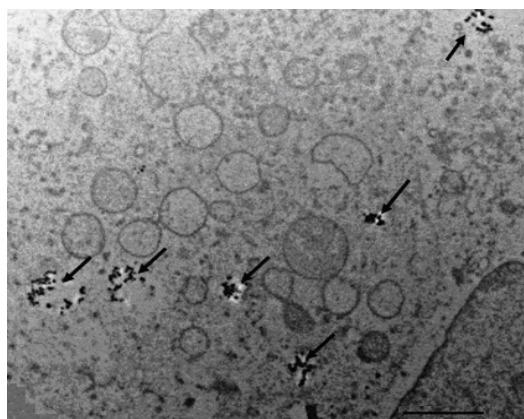

**Figure S6.** Representative TEM image of the treated MEL-5 cells after 12-h incubation with  $\gamma\text{-Fe}_2\text{O}_3\text{@MSNPs}$  (100  $\mu\text{g/mL}$ ) at 37 °C (scale bar: 2  $\mu\text{m}$ ). Small dots marked with arrows refer to the internalized  $\gamma\text{-Fe}_2\text{O}_3\text{@MSNPs}$ .

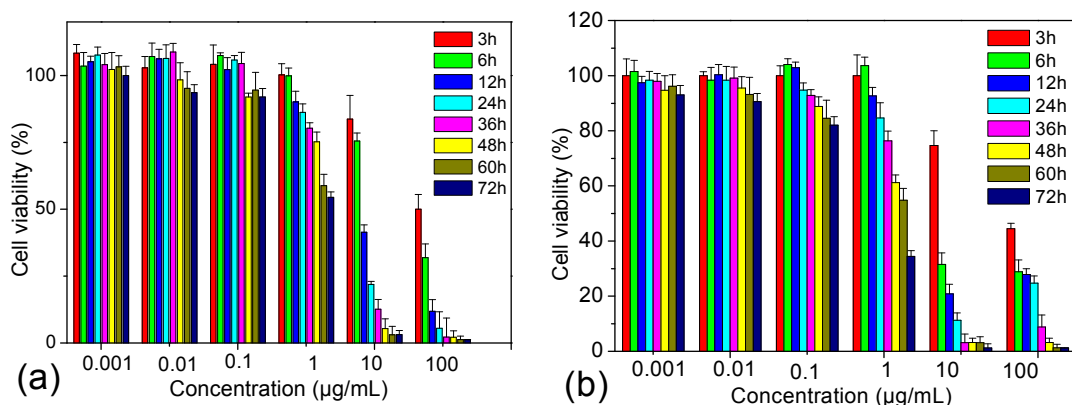

**Figure S7.** Cytotoxicity profiles of DOX with different concentrations against the MEL-5 cell line determined via the MTS assay at 37 °C (a) and 40 °C (b), respectively. Percentage viabilities of the treated MEL-5 cells were expressed relative to the untreated cells, which were taken as a control (100% viability), results are all presented as mean value  $\pm$  standard deviation ( $n = 5$ ).

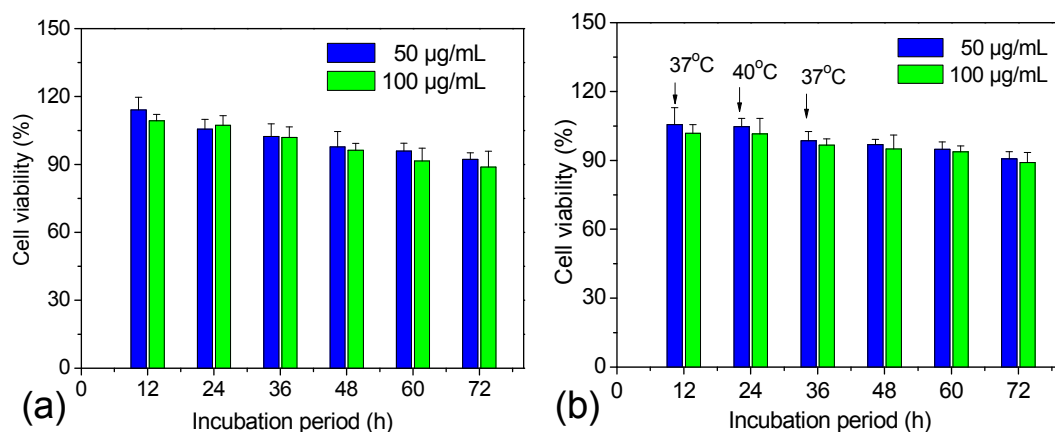

**Figure S8.** Cytotoxicity profiles of the TD-loaded  $\gamma\text{-Fe}_2\text{O}_3@$ MSNPs (without DOX uploaded) against the MEL-5 cell line at 40 °C (a) or 37/40 °C heating off/on cycles (b). Percentage cell viabilities of the treated MEL-5 cells were expressed relative to the untreated cells, which were taken as a control (100% viability), results are all presented as mean value  $\pm$  standard deviation ( $n = 5$ ).

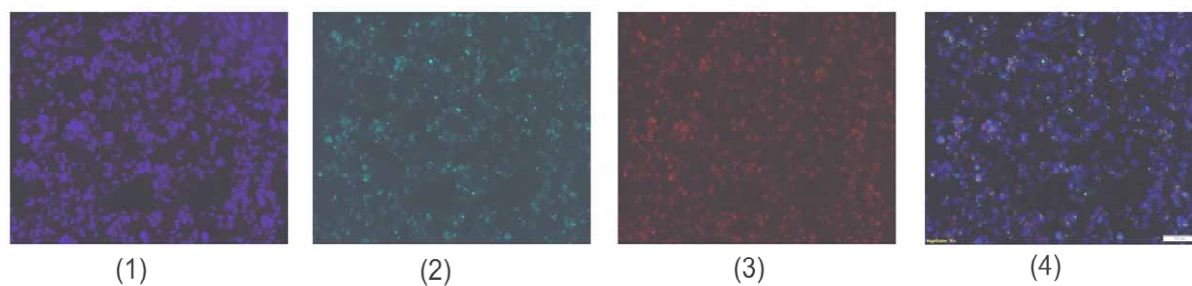

**Figure S9.** CLSM images of the MEL-5 cells after 24-h incubation with the FITC-labelled DOX-loaded  $\gamma$ -Fe<sub>2</sub>O<sub>3</sub>@MSNPs (100  $\mu$ g/mL, without TD as gatekeepers) at 37 °C: (1) nuclei stained with DAPI (blue), (2) FITC (green), (3) DOX (red), (4) merged image of (1), (2) and (3).

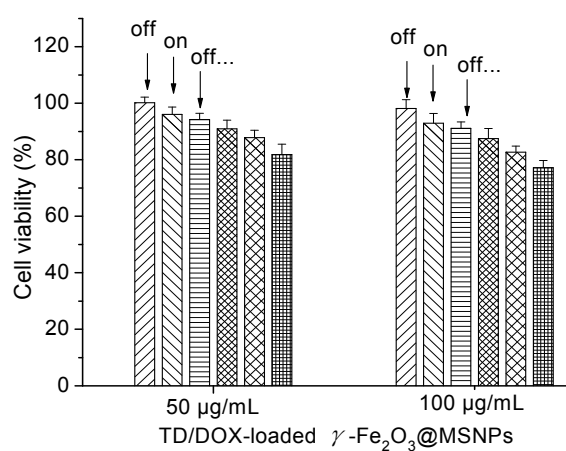

**Figure S10.** Cytotoxicity profiles of the TD/DOX-loaded  $\gamma$ -Fe<sub>2</sub>O<sub>3</sub>@MSNPs against MEL-5 cells under multiple heating off (37°C)/on (40°C) cycles with a time interval of 12 h; percentage cell viabilities of the treated MEL-5 cells were expressed relative to the untreated cells (control, 100% viability), and all results were presented as mean value  $\pm$  standard deviation (n = 5).
